# Supplementary material
Source: publisher figshare collection journal article supplement (https://future-science-group.figshare.com/ndownloader/files/28351572)
Supplement: Supplementary file 1 [file 28351572]

**Supplemental Table 1. Univariate logistic regression analyses for each predictors association with greater or less than 50% reduction in pain.**

| **<50% vs ≥50% reduction in pain intensity** | | | |
| --- | --- | --- | --- |
| **Effects** |  | | |
| Univariate logistic regression | | |
| **Odds Ratio** | **Confidence Interval** | **P-value** |
| Age (years) | 1 | [0.98, 1.022] | 0.9982 |
| Sex (Female vs. Male) | 0.68 | [0.34, 1.36] | 0.2785 |
| BMI (Body Mass Index) | 0.99 | [0.96, 1.03] | 0.6656 |
| Smoking status (Current vs. former and never) | 1.41 | [0.51, 3.95] | 0.5076 |
| History knee surgery (Yes vs. No) | 0.91 | [0.48, 1.75] | 0.7853 |
| History of anxiety (Yes vs. No) | 0.66 | [0.33, 1.33] | 0.2456 |
| History of depression (Yes vs. No) | 0.58 | [0.30, 1.13] | 0.1122 |
| Baseline pain (Numeric Rating Score) | 1.16 | [1.01, 1.33] | 0.0418 |
| Type of RFA (Cooling vs. Thermal) | 0.89 | [0.34, 2.34] | 0.8203 |
| Duration between procedure and follow-up (months) | 0.997 | [0.99, 1.00] | 0.1874 |
| Success of blocks 75% (Yes vs. No) | 1.44 | [0.64, 3.26] | 0.3767 |
| Type of proceduralist (Attending vs. Fellow) | 1.20 | [0.55, 2.61] | 0.6526 |
